# Supplementary material for: Coordination-perturbed single-molecule magnet behaviour of mononuclear dysprosium complexes
Source: Royal Society of Chemistry journal article supplement (doi:10.1039/c1dt10050e), 2011-01-01
Supplement: c1dt10050e.pdf [file c1dt10050e.pdf]

## Coordination-perturbed single-molecule magnet behavior of mononuclear dysprosium complexes

Gong-Jun Chen,<sup>a</sup> Chun-Yan Gao,<sup>a</sup> Jin-Lei Tian,<sup>\*a</sup> Jinkui Tang,<sup>b</sup> Wen Gu,<sup>a</sup> Xin Liu,<sup>a</sup>  
Shi-Ping Yan,<sup>\*a</sup> Dai-Zheng Liao,<sup>a</sup> Peng Cheng<sup>a</sup>

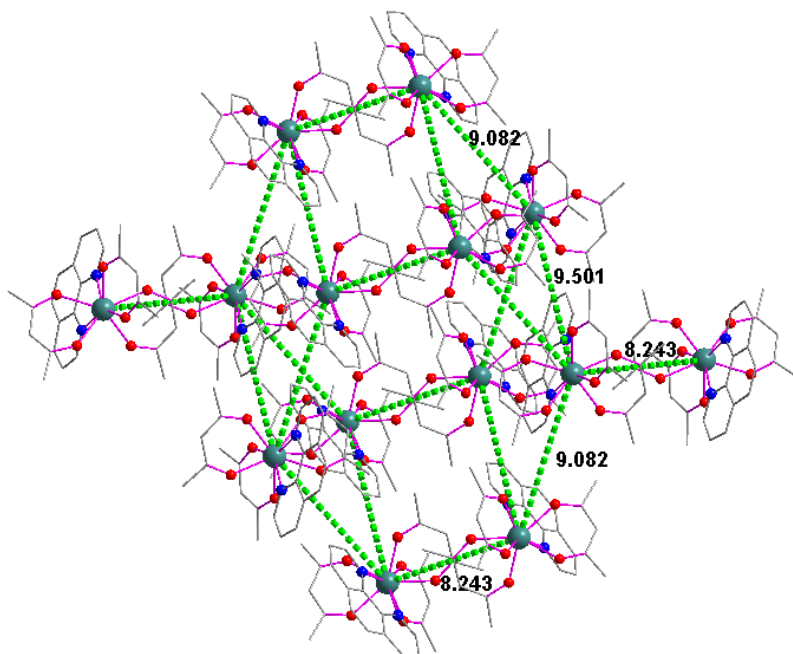

Fig. S1 Packing diagram of compound 1

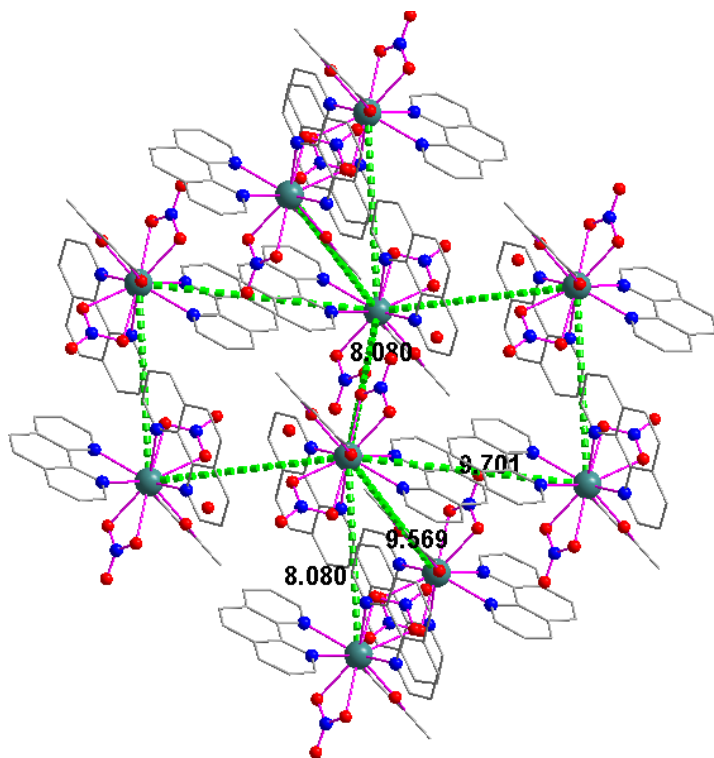

Fig. S2 Packing diagram of compound 2

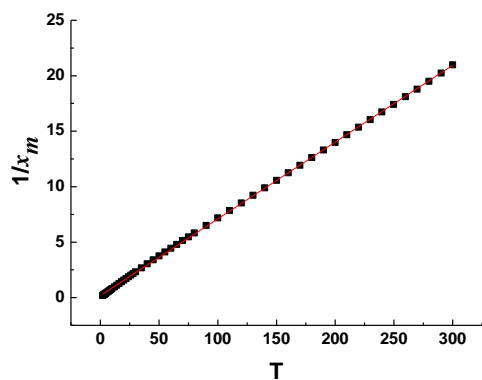

**Fig. S3** A fit of the experimental data to a Curie-Weiss law of complex **1**

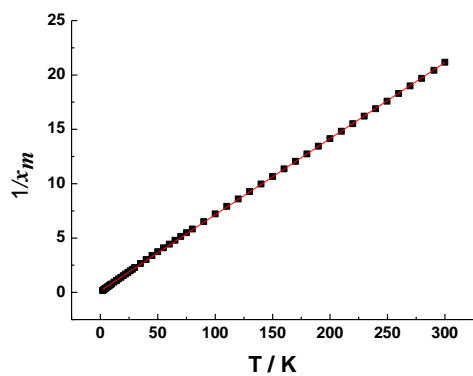

**Fig. S4** A fit of the experimental data to a Curie-Weiss law of complex **2**

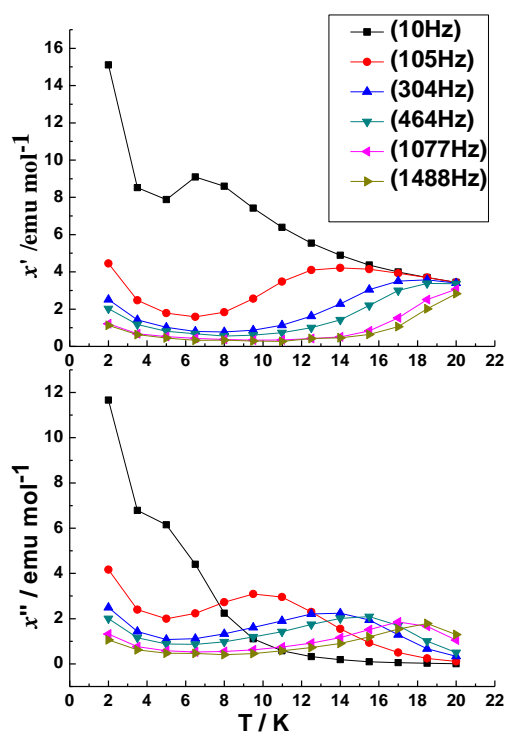

**Fig S5** The temperature dependence of ac susceptibility at frequencies from 10 to 1488 Hz for **1**

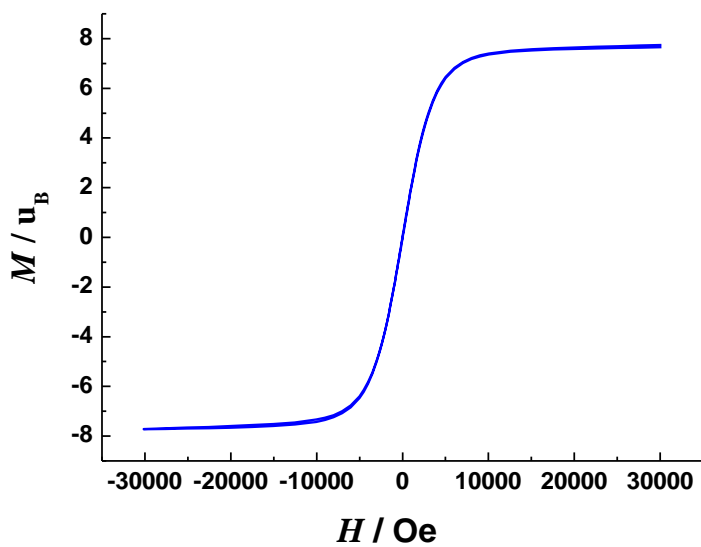

**Fig. S6**  $M$  vs.  $H$  data of **1** at 2 K emphasizing the absence of significant magnetic hysteresis loop
